# Supplementary material
Source: PubMed Central journal article supplement (PMC4534469)
Supplement: 15_031_Hojen_Suppl.pdf [file 15_031_Hojen_Suppl.pdf]

Supplemental Data

**Interleukin-37 Expression Is Increased in Chronic HIV-1-Infected Individuals and Is Associated with Inflammation and the Size of the Total Viral Reservoir**

Jesper F Højen,<sup>1</sup> Thomas A Rasmussen,<sup>1</sup> Karen Lise D Andersen,<sup>1</sup> Anni A Winckelmann,<sup>1</sup> Rune R Laursen,<sup>1</sup> Jesper D Gunst,<sup>1</sup> Holger J Møller,<sup>2</sup> Mayumi Fujita,<sup>3</sup> Lars Østergaard,<sup>1</sup> Ole S Søgaard,<sup>1</sup> Charles A Dinarello,<sup>4,5</sup> and Martin Tolstrup<sup>1</sup>

Online address: <http://www.molmed.org>

The Feinstein Institute for Medical Research North Shore LIJ  
Empowering Imagination. Pioneering Discovery.

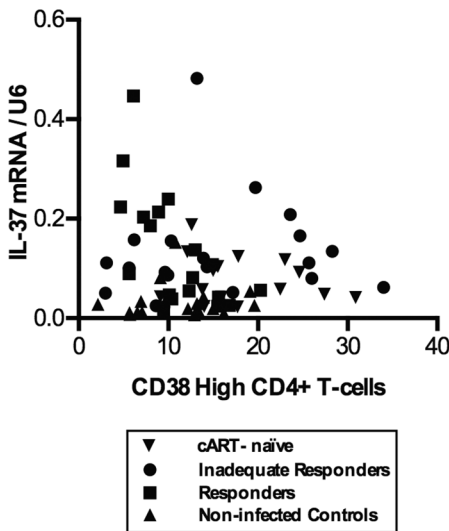

**Supplementary Figure S1.** Correlation between CD38 expression on CD4+ T-cells and IL-37 mRNA in PBMCs.

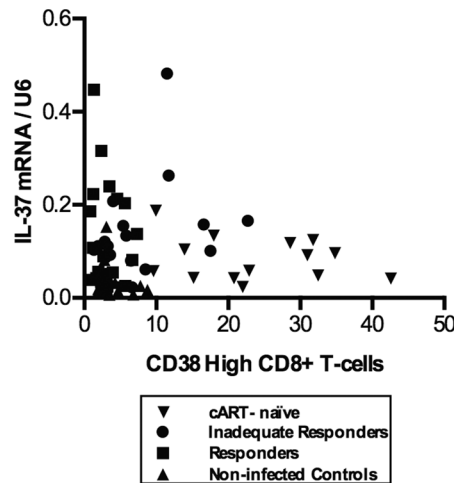

**Supplementary Figure S2.** Correlation between CD38 expression on CD8+ T-cells and IL-37 mRNA in PBMCs.
